# Supplementary material
Source: Elsevier journal article supplement (https://www.sciencedirect.com/science/article/pii/S1134282X14000591)
Supplement: mmc1 [file S1134282X14000591:mmc1.pdf]

## **Anexo 1:** Resultado de la encuesta sobre la utilización de determinadas prácticas en atención primaria\*

### **1.1.: Utilización de antibióticos en procesos no indicados.**

| PREGUNTAS                                                                                                                               | Muy Raramente<br>(<1% de los casos) | Ocasionalmente<br>(1-10% de los casos) | Con cierta frecuencia (10-25% de los casos) | Con bastante frecuencia (25-50% de los casos) | La mayoría de los casos (>50% de los casos) |
|-----------------------------------------------------------------------------------------------------------------------------------------|-------------------------------------|----------------------------------------|---------------------------------------------|-----------------------------------------------|---------------------------------------------|
| <i>En su opinión....</i>                                                                                                                | n (%)                               | n (%)                                  | n (%)                                       | n (%)                                         | n (%)                                       |
| P1. Se prescriben antibióticos ante una rinosinusitis no complicada con menos de 7 días de evolución sintomática                        | 40 (18,9%)                          | 44 (20,8%)                             | 59 (27,8%)                                  | 44 (20,8)                                     | 25 (11,8)                                   |
| P5. Se prescriben antibióticos para tratar adenovirus conjuntivitis víricas                                                             | 62 (29,2 %)                         | 44 (20,8%)                             | 50 (23,6%)                                  | 27 (12,7%)                                    | 28 (13,2%)                                  |
| P6. Se prescriben antibióticos por vía oral para tratar episodios de otitis externa no complicada                                       | 77 (36,3%)                          | 65 (30,7%)                             | 33 (15,6%)                                  | 25 (11,8%)                                    | 12 (5,7%)                                   |
| P7. Se prescriben antibióticos para tratar procesos respiratorios de probable origen viral en niños (sinusitis, faringitis, bronquitis) | 45 (21,2%)                          | 65 (30,7%)                             | 55 (25,9%)                                  | 36 (17,0%)                                    | 7 (3,3%)                                    |
| P13. Se utilizan antibióticos para tratar bacteriurias asintomáticas en ancianos                                                        | 36 (17,0%)                          | 66 (31,1%)                             | 47 (22,2%)                                  | 39 (18,4%)                                    | 22 (10,4%)                                  |

### **1.2.: Utilización de pruebas diagnósticas de efectividad dudosa**

| PREGUNTAS                                                                                                                                                                                                                   | Muy Raramente<br>(<1% de los casos) | Ocasionalmente<br>(1-10% de los casos) | Con cierta frecuencia (10-25% de los casos) | Con bastante frecuencia (25-50% de los casos) | La mayoría de los casos (>50% de los casos) |
|-----------------------------------------------------------------------------------------------------------------------------------------------------------------------------------------------------------------------------|-------------------------------------|----------------------------------------|---------------------------------------------|-----------------------------------------------|---------------------------------------------|
| <i>En su opinión....</i>                                                                                                                                                                                                    | n (%)                               | n (%)                                  | n (%)                                       | n (%)                                         | n (%)                                       |
| P2. Se realizan pruebas de imagen en los pacientes que acuden a consulta por dolor lumbar en las primeras 6 semanas de evolución, aunque no existan signos de alerta que puedan hacer sospechar una enfermedad basal grave. | 43 (20,3%)                          | 80 (37,7%)                             | 41 (19,3%)                                  | 34 (16,0)                                     | 14 (6,6%)                                   |
| P9. Se solicitan pruebas de imagen en pacientes con cefalea no complicada                                                                                                                                                   | 109 (51,4%)                         | 65 (30,7%)                             | 28 (13,2%)                                  | 8 (3,8%)                                      | 1 (0,5%)                                    |

### **1.3.: Utilización de intervenciones de cribado de forma inadecuada**

| PREGUNTAS                                                                                                                              | Muy Raramente<br>(<1% de los casos) | Ocasionalmente<br>(1-10% de los casos) | Con cierta frecuencia (10-25% de los casos) | Con bastante frecuencia (25-50% de los casos) | La mayoría de los casos (>50% de los casos) |
|----------------------------------------------------------------------------------------------------------------------------------------|-------------------------------------|----------------------------------------|---------------------------------------------|-----------------------------------------------|---------------------------------------------|
| <i>En su opinión....</i>                                                                                                               | n (%)                               | n (%)                                  | n (%)                                       | n (%)                                         | n (%)                                       |
| P3. Se solicita densitometría ósea para cribado de osteoporosis en mujeres menores de 65 años o varones < de 70 sin factores de riesgo | 113 (53,3%)                         | 66 (31,1%)                             | 23 (10,8%)                                  | 7 (3,3%)                                      | 3 (1,4%)                                    |

| PREGUNTAS                                                                                                                                                                   | Muy Raramente<br>(<1% de los casos) | Ocasionalmente<br>(1-10% de los casos) | Con cierta frecuencia (10-25% de los casos) | Con bastante frecuencia (25-50% de los casos) | La mayoría de los casos (>50% de los casos) |
|-----------------------------------------------------------------------------------------------------------------------------------------------------------------------------|-------------------------------------|----------------------------------------|---------------------------------------------|-----------------------------------------------|---------------------------------------------|
| P4. Se realizan electrocardiogramas anuales de forma rutinaria en pacientes sin factores de riesgo o sin síntomas sospechosos de patología cardíaca                         | 111 (52,4%)                         | 56 (26,4%)                             | 27 (12,7%)                                  | 13 (6,1 %)                                    | 4 (1,9%)                                    |
| P15. Se realizan citologías ANUALES de cribado para el cáncer cervical en mujeres entre 30-65 años                                                                          | 72 (34,0%)                          | 46 (21,7%)                             | 41 (19,3%)                                  | 25 (11,8%)                                    | 25 (11,8%)                                  |
| P16. Se realiza citología vaginal de cribado para el cáncer de cuello en mujeres menores de 21 años                                                                         | 76 (35,8%)                          | 76 (35,8%)                             | 38 (17,9%)                                  | 14 (6,6%)                                     | 4 (1,9%)                                    |
| P17. Se realiza citología vaginal de cribado para el cáncer de cuello en mujeres mayores de 65 años con historia previa de cribado negativa y sin otros factores de riesgo. | 94 (44,3%)                          | 69 (32,5%)                             | 25 (11,8%)                                  | 17 (8,0%)                                     | 3 (1,4%)                                    |

#### 1.4: Utilización de intervenciones terapéuticas de manera inadecuada.

| PREGUNTAS                                                                                                                                                                                                          | Muy Raramente<br>(<1% de los casos) | Ocasionalmente<br>(1-10% de los casos) | Con cierta frecuencia (10-25% de los casos) | Con bastante frecuencia (25-50% de los casos) | La mayoría de los casos (>50% de los casos) |
|--------------------------------------------------------------------------------------------------------------------------------------------------------------------------------------------------------------------|-------------------------------------|----------------------------------------|---------------------------------------------|-----------------------------------------------|---------------------------------------------|
| <i>En su opinión....</i>                                                                                                                                                                                           | n (%)                               | n (%)                                  | n (%)                                       | n (%)                                         | n (%)                                       |
| P8. Se prescriben antitusivos o anticatarrales en menores de 4 años                                                                                                                                                | 59 (27,8%)                          | 76 (35,8%)                             | 37 (17,5%)                                  | 19 (9,0%)                                     | 13 (6,1%)                                   |
| P10. Se utilizan medicamentos para mantener una hemoglobina glicada menor de 7,5 % en pacientes mayores de 65 años con diabetes tipo II                                                                            | 8 (3,8%)                            | 21 (9,9 %)                             | 38 (17,9%)                                  | 68 (32,1%)                                    | 77 (36,3%)                                  |
| P11. Se utilizan benzodiacepinas u otros hipnóticos sedantes como primera elección para tratar el insomnio, la agitación o síntomas delirantes en pacientes adultos                                                | 10 (4,7%)                           | 30 (14,2%)                             | 34 (16,0%)                                  | 66 (31,1%)                                    | 68 (32,1%)                                  |
| P12. Se prescriben antipsicóticos como primera elección para tratar síntomas psicológicos y de comportamiento relacionados con la demencia                                                                         | 32 (15,1%)                          | 48 (22,6%)                             | 52 (24,5%)                                  | 48 (22,6%)                                    | 30 (14,2%)                                  |
| P14. Se prescriben analgésicos antiinflamatorios no esteroideos, en los casos en los que sea necesaria una analgesia, en pacientes con Hipertensión Arterial, Insuficiencia Renal Crónica o Insuficiencia Cardíaca | 28 (13,2%)                          | 51 (24,1%)                             | 57 (26,9%)                                  | 59 (27,8%)                                    | 17 (8,0%)                                   |

\* En cada tabla se muestra el número y proporción n° (%) de respuestas a los diferentes ítems de cada pregunta.
